# Supplementary material for: Spectral affinity in protein networks
Source: Springer Nature journal article supplement (doi:10.1186/1752-0509-3-112), 2009-11-29

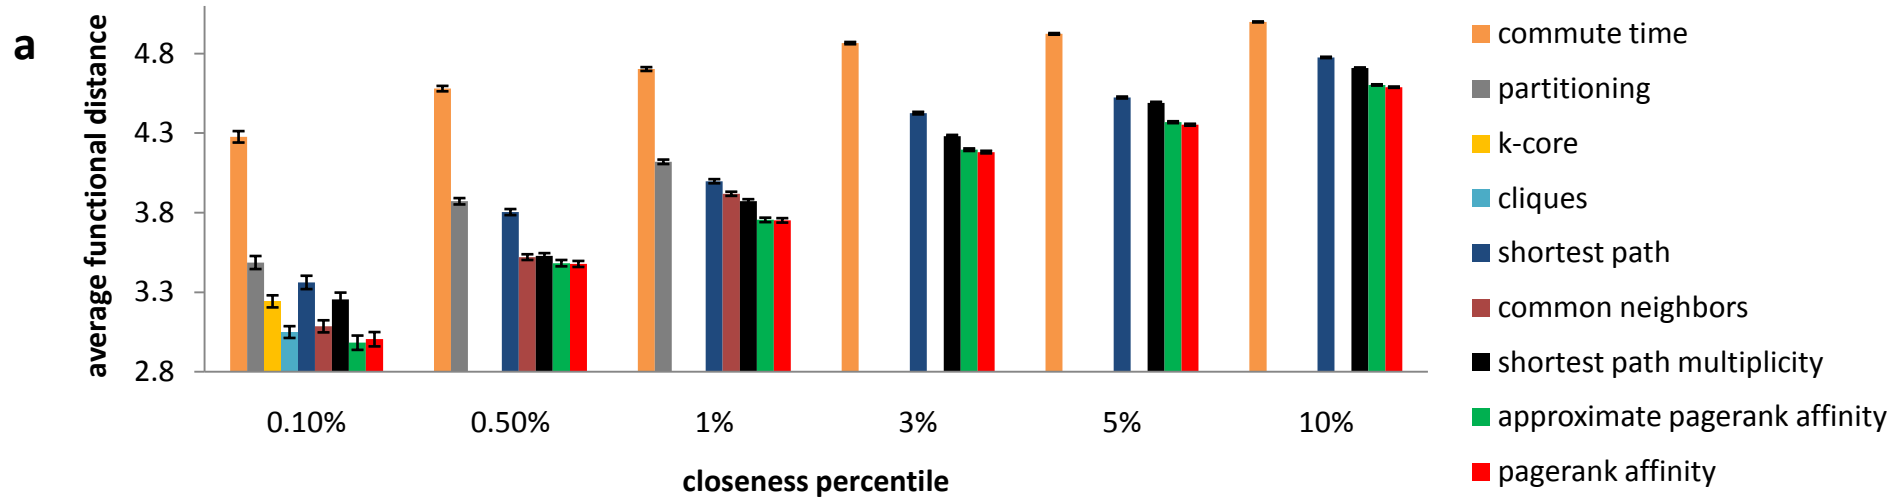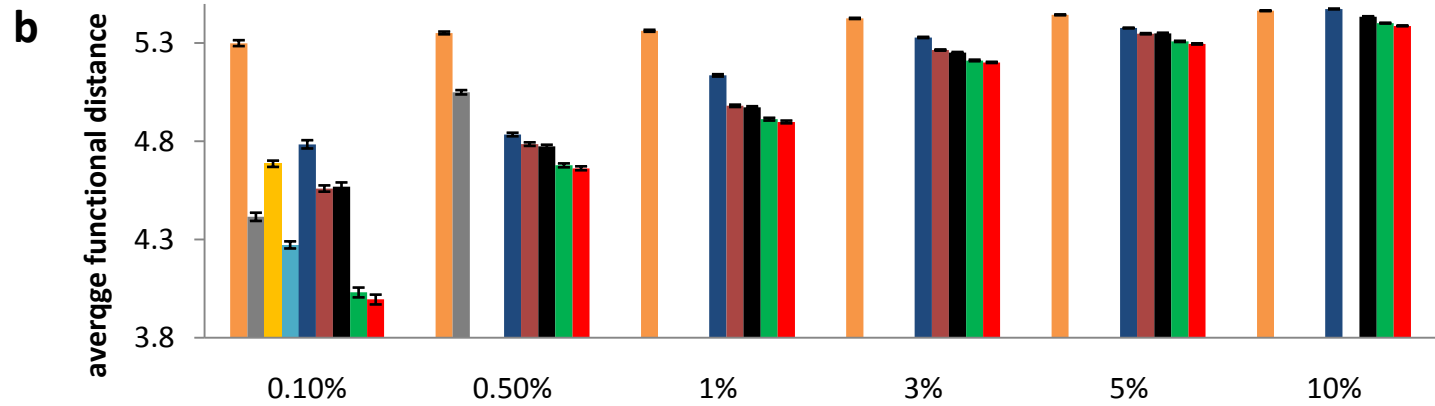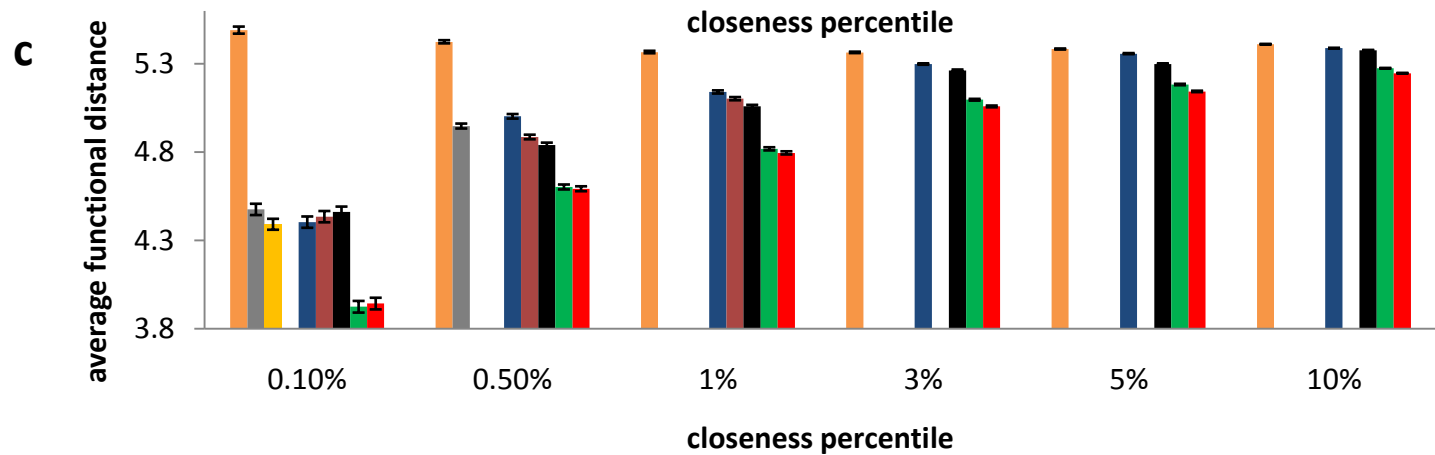

Supplement: 12918_2009_380_MOESM8_ESM.pdf [file 12918_2009_380_MOESM8_ESM.pdf]
